# Supplementary material for: Molecular insights into the oil-in-water emulsification and demulsification of guanidino-based CO 2 /N 2 switchable surfactants
Source: Royal Society of Chemistry journal article supplement (doi:10.1039/d5ra08773b), 2026-01-01
Supplement: d5ra08773b1.pdf [file d5ra08773b1.pdf]

## Supporting Information

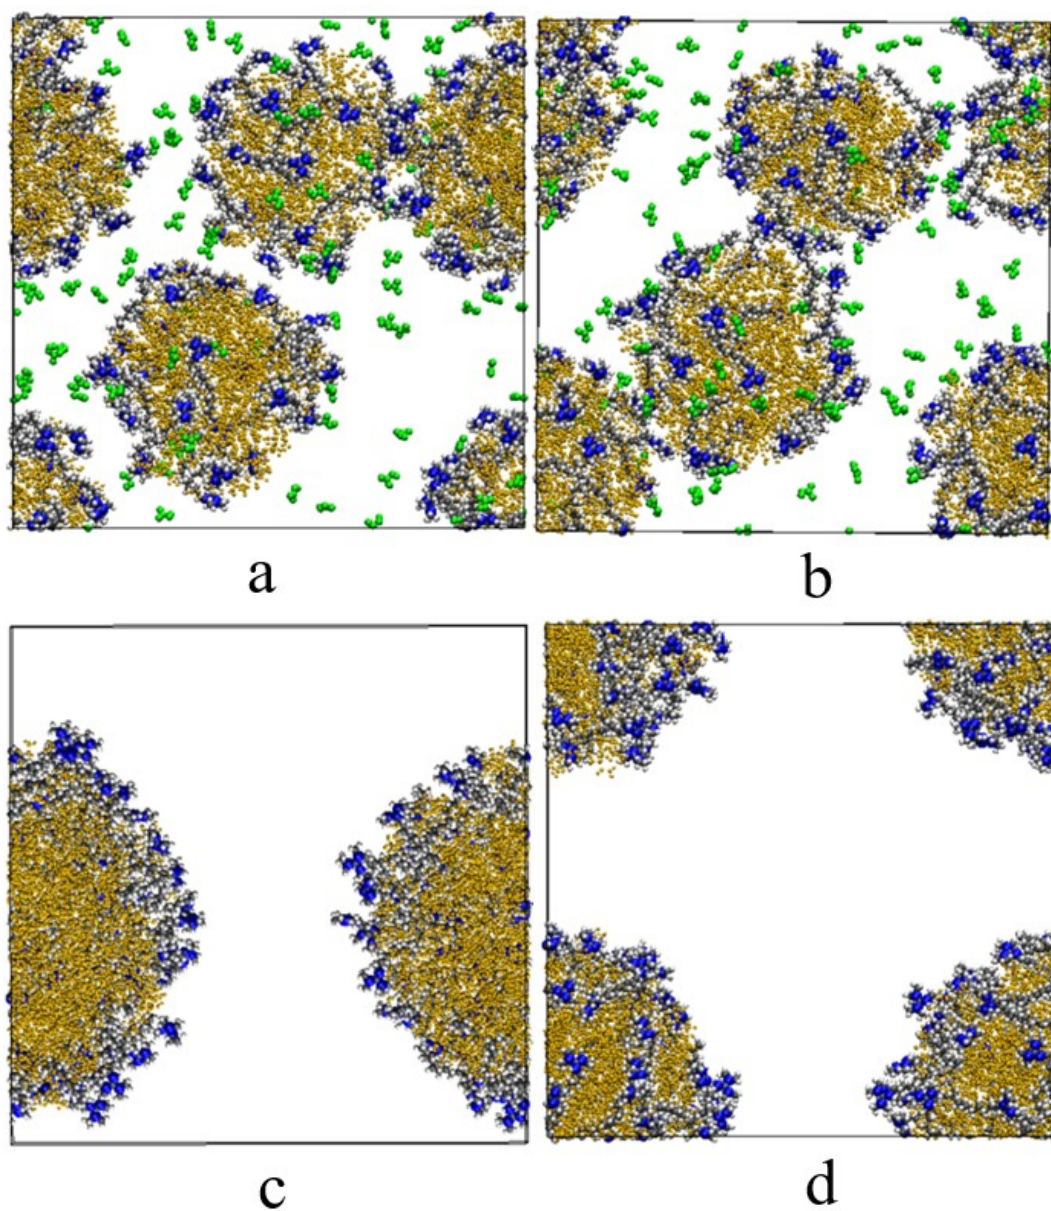

Figure S1. Final configurations of the DTMGH and DTMG systems in the emulsion model, where a, b are the front view and top view of the DTMGH system, respectively, and c, d are the front view and top view of the DTMG system, respectively. Yellow represents the oil phase, green represents the carbonate ion, and the carbon, nitrogen, and hydrogen atoms in the surfactant are grey, blue, and white, respectively. Water molecules are hidden.
